# Supplementary material for: Design and performance of an ultra-sensitive and super-stretchable hydrogel for artificial skin
Source: Royal Society of Chemistry journal article supplement (doi:10.1039/d1tc03232a), 2021-01-01
Supplement: d1tc03232a1.pdf [file d1tc03232a1.pdf]

## Electronic Supplementary Information

### Design and performance of an ultra-sensitive and super-stretchable hydrogel for artificial skin

Chunhui Luo <sup>a,b,c,\*</sup>, Xinyue Deng <sup>a</sup>, Shuai Xie <sup>a</sup>

<sup>a</sup> College of Chemistry and Chemical Engineering, North Minzu University, Yinchuan, Ningxia 750021, China, \*Corresponding Author. E-mail address: luo@nmu.edu.cn (C. Luo).

<sup>b</sup> Key Laboratory of Chemical Engineering and Technology, State Ethnic Affairs Commission, North Minzu University, Yinchuan 750021, Ningxia, China

<sup>c</sup> Ningxia Key Laboratory of Solar Chemical Conversion Technology, North Minzu University, Yinchuan 750021, China

**Table S1.** The experimental ingredients and nomenclatures of FMCH-n hydrogels.

| Sample    | AM(g) | KPS (g) | MBAA (g) | NaCl (g) | flowerlike micelles (g) | Water (g) |
|-----------|-------|---------|----------|----------|-------------------------|-----------|
| FMCH-0    | 3.5   | 0.035   | 0.035    | 0        | 0.035                   | 8.16      |
| FMCH-8.2  | 3.5   | 0.035   | 0.035    | 0.669    | 0.035                   | 8.16      |
| FMCH-15.4 | 3.5   | 0.035   | 0.035    | 1.257    | 0.035                   | 8.16      |
| FMCH-26.5 | 3.5   | 0.035   | 0.035    | 2.162    | 0.035                   | 8.16      |

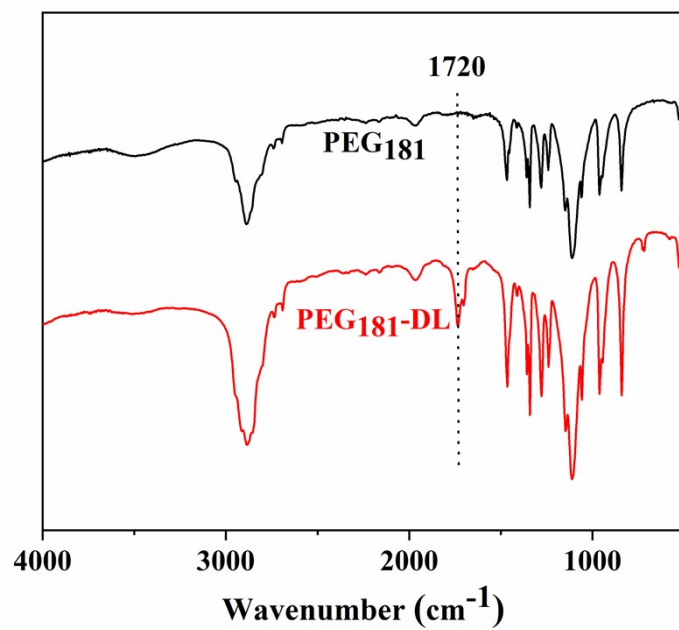

**Fig. S1** FT-IR spectra of PEG<sub>181</sub> and PEG<sub>181</sub>-DL.

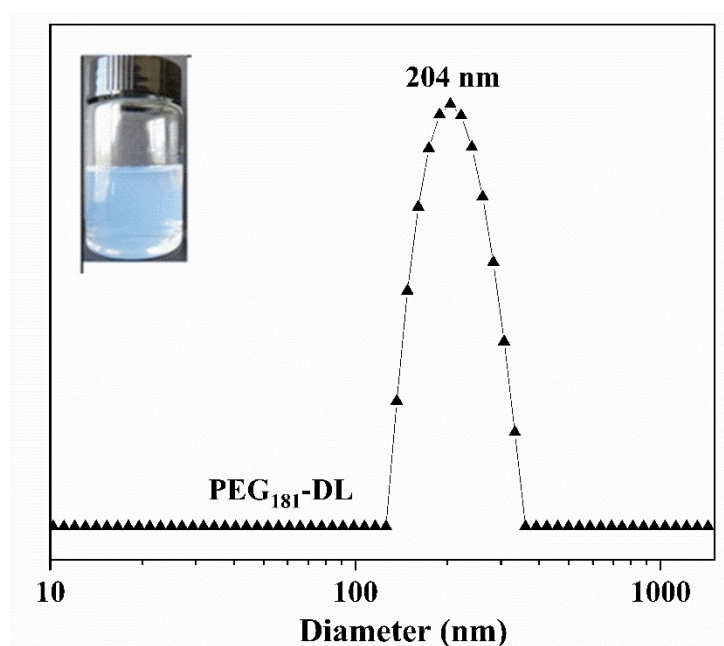

**Fig. S2** Diameter and photo image of the flowerlike micelle.

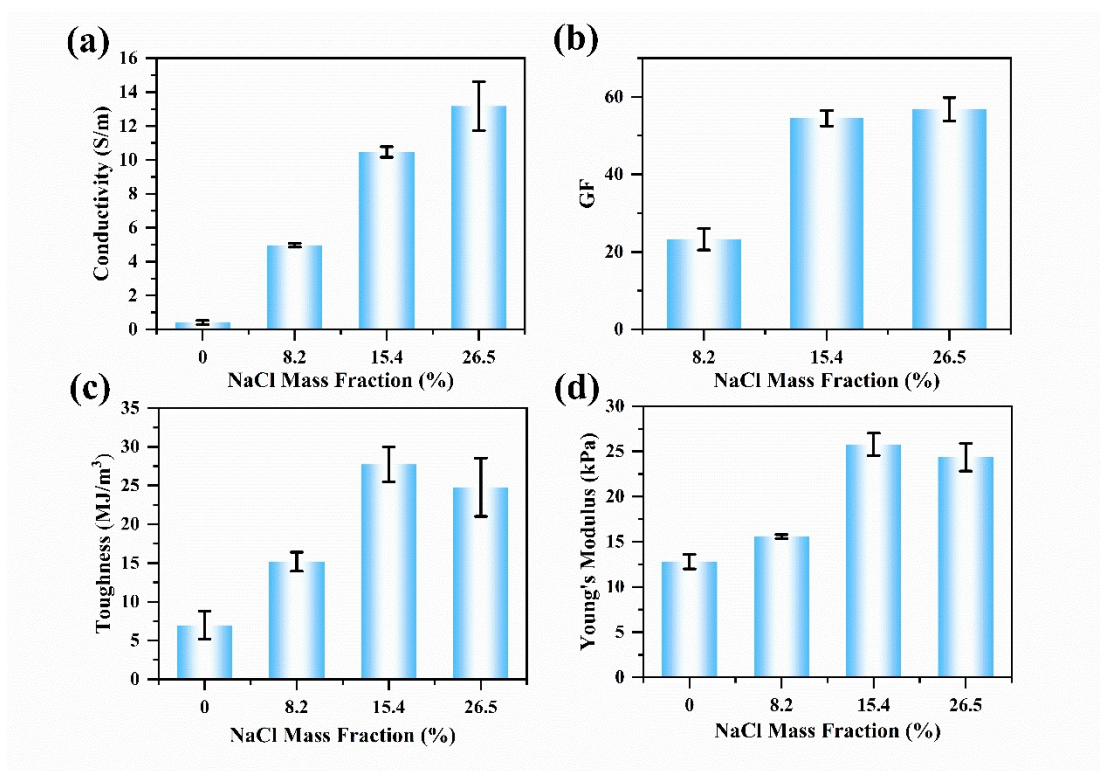

**Fig. S3** The (a) conductive, (b) GF, (c) toughness and (d) Young's Modulus of the FMCH-n hydrogels prepared with various mass fraction of NaCl.

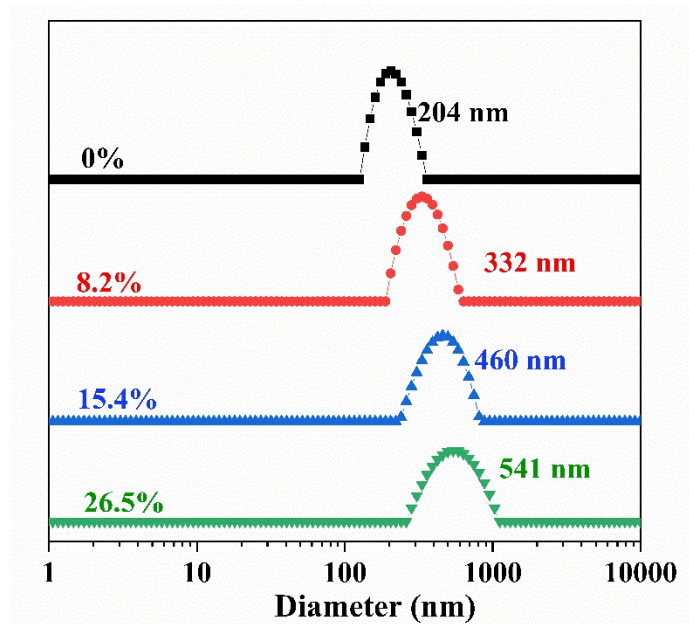

**Fig. S4** Diameter of the flowerlike micelle with various mass fraction of NaCl.

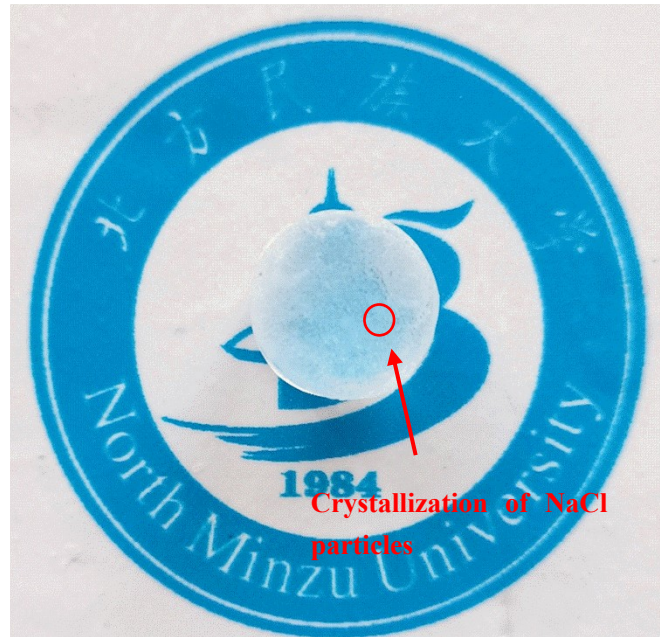

Fig. S5 The photo of FMCH-26.5 hydrogel.

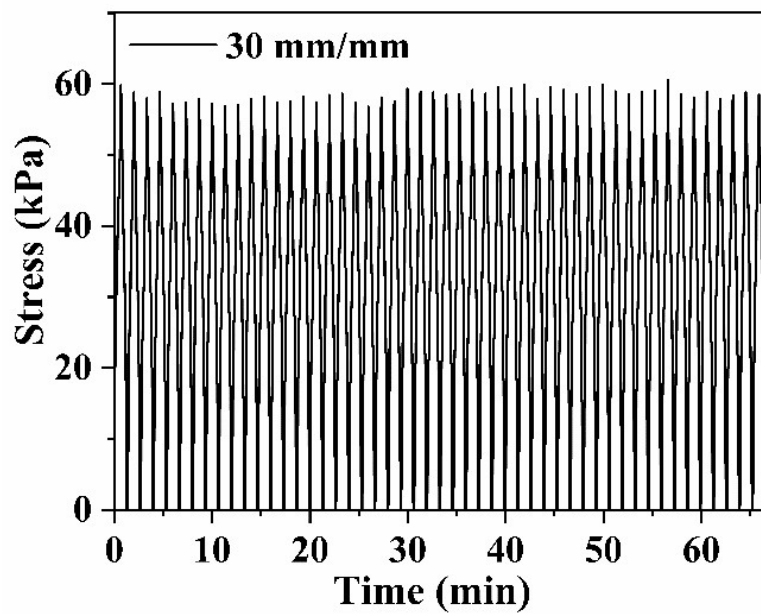

Fig. S6 50 cyclic loading-unloading tensile tests of the FMCH-15.4 hydrogel.

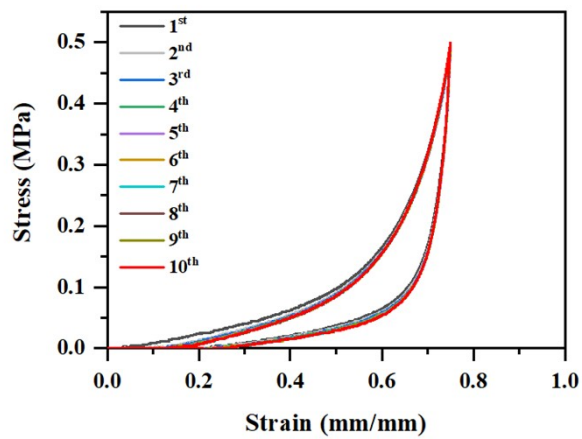

**Fig. S7** Compression-relaxation cycles with maximum strain of 75%.

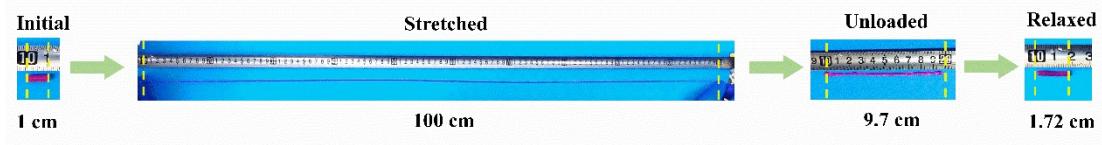

**Fig. S8** Photographs of the FMCH-0 hydrogel after stretching 100 times its original length and relaxing at room temperature overnight.

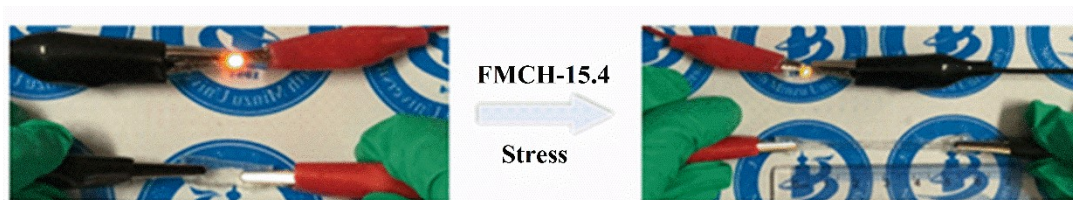

**Fig. S9** The LED light became dim after stretching.



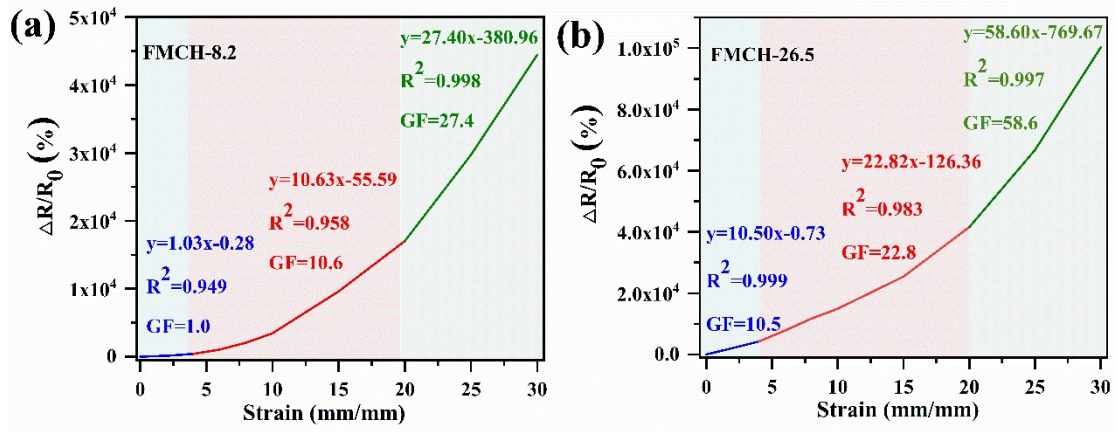

**Fig. S10** The relative resistance changes of the (a) FMCH-8.2 hydrogel and (b) FMCH-26.5 hydrogel sensor during stretching process.

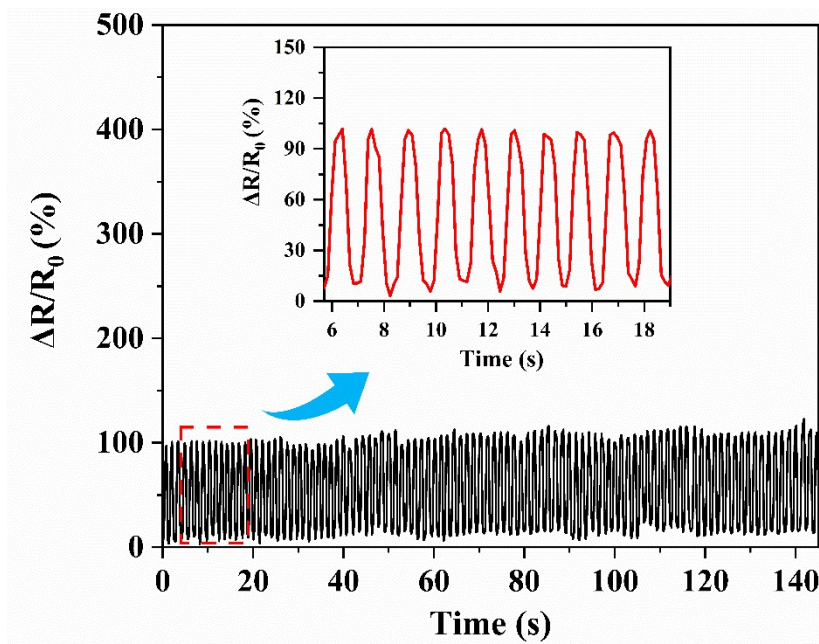

**Fig. S11** The cycling stability test of the FMCH-15.4 hydrogel to the tensile stress for 100 cycles.

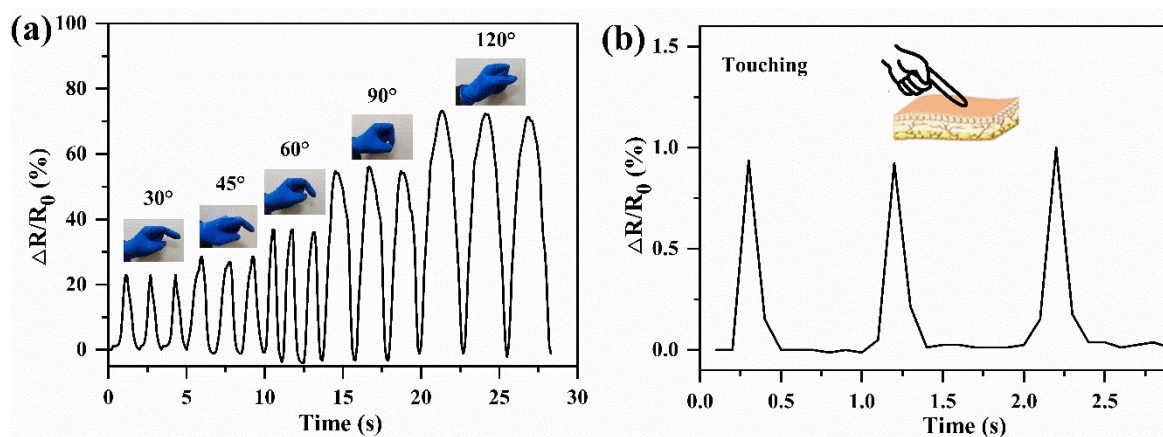

**Fig. S12** The relative resistance changes of the FMCH-15.4 gel to monitor various human motions: (a) finger bending at different angles ( $0^\circ$ ,  $30^\circ$ ,  $45^\circ$ ,  $60^\circ$ ,  $90^\circ$  and  $120^\circ$ ); (b) touching.

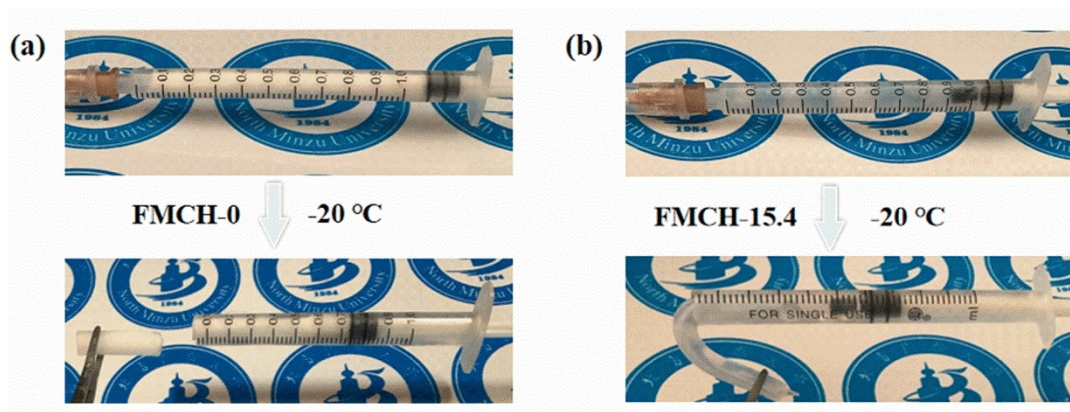

**Fig. S13** The photos of FMCH-0 and FMCH-15.4 hydrogels at  $-20^\circ\text{C}$ .

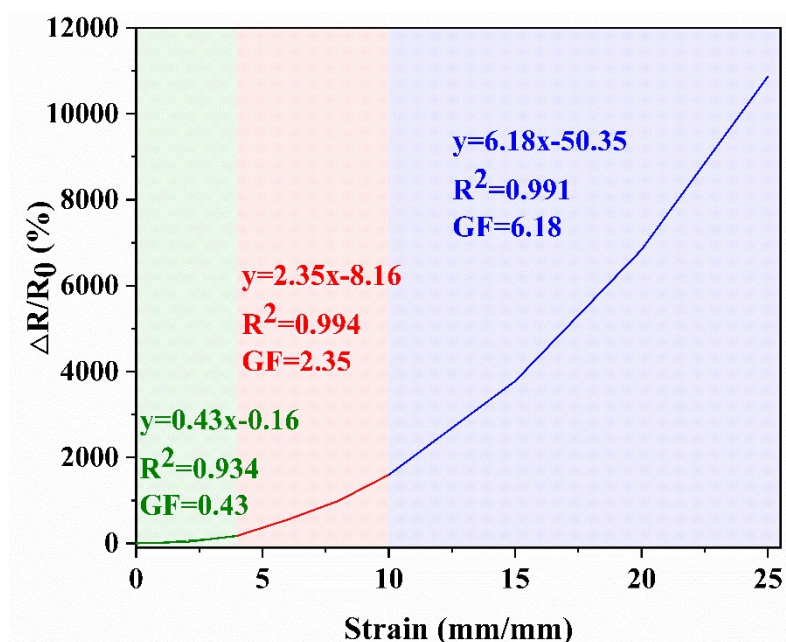

**Fig. S14** The variations in relative resistance and the sensitivity of FMCH-15.4 hydrogel as a function of tensile strain at -20 °C.

**Table S2.** The water content and gauge factor of FMCH-15.4 hydrogel for different time at room temperature.

| Time (h) | Water content (%) | GF   |
|----------|-------------------|------|
| 0.5      | 57.71             | 8.93 |
| 1        | 54.37             | 6.09 |
| 2        | 51.06             | 4.69 |
| 3        | 49.75             | 1.99 |
| 24       | 26.34             | N.A. |
